# Supplementary material
Source: PubMed Central journal article supplement (PMC4234549)
Supplement: pnas.201418483SI.pdf [file pnas.201418483SI.pdf]

# Supporting Information

Kolmos et al. 10.1073/pnas.1418483111

## SI Materials and Methods

**Promoter Analysis.** Natural variation [i.e., single nucleotide polymorphisms (SNPs)] around the HSE repeat was analyzed using the sequencing data of ~500 *Arabidopsis* accessions at [1001genomes.org](http://1001genomes.org). Promoter sequences from other species were downloaded from GBrowse at Phytozome ([www.phytozome.net](http://www.phytozome.net)). The following *PRR7* loci (with database IDs) were identified using BLASTP: *Arabidopsis lyrata* (939656), *Capsella rubella* (Carubv10000314m.g), *Thellungiella salsuginea* (*T. halophila*; Thhalv10012789m.g), and *Brassica rapa* (Bra009565). The sequences were processed and aligned in Geneious R6 (Biomatters; [www.geneious.com](http://www.geneious.com)).

**Luciferase Imaging.** Bioluminescence of single seedlings was monitored as described previously (1) or with a PIXIS 2048B back-illuminated digital CCD system (Princeton Instruments) with a Distagon T 28-mm large-format lens F/2.0 25-mm F/1.4 1" (Megapixel), at 15- to 25-min acquisitions every 1–2.5 h. For compensation assays, seedlings were entrained under 12L:12D at 22 °C and transferred to LL and 27 °C at lights on (ZT0). For salt stress, the 1× MS + 3% sucrose plates were supplemented with

100 mM NaCl. Circadian period estimates were based on the data recorded after the first 24–36 h under constant conditions by FFT-NLLS analysis in Biological Rhythms Analysis Software System (BRASS 3.0) (2). In gating assays, seedlings on 1× MS + 3% sucrose plates were sprayed with 5 M NaCl at the indicated times on the first day under LL, and 15-min acquisitions were performed every 1 h. Imaging experiments were performed two or three times, yielding similar results.

**Gene Expression Analysis.** Seedlings were entrained in a growth chamber (Percival) under a 12L:12D cycle at 22 °C and collected at the 1-wk-old stage. Whole seedlings were harvested, and total RNA extraction, cDNA synthesis, and qPCR were performed as described previously (1). For qPCR analysis, primer efficiencies (40–100%) were taken into account using the features of Bio-Rad CFX Manager 3.1 software. The qPCR data represent values from two or three biological replicates, each with three technical replicates. The graphs illustrate the expression from one biological replicate, with error bars denoting the SD or SEM of the biological replicates.

1. Helfer A, et al. (2011) *LUX ARRHYTHMO* encodes a nighttime repressor of circadian gene expression in the *Arabidopsis* core clock. *Curr Biol* 21(2):126–133.

2. Plautz JD, et al. (1997) Quantitative analysis of *Drosophila* period gene transcription in living animals. *J Biol Rhythms* 12(3):204–217.

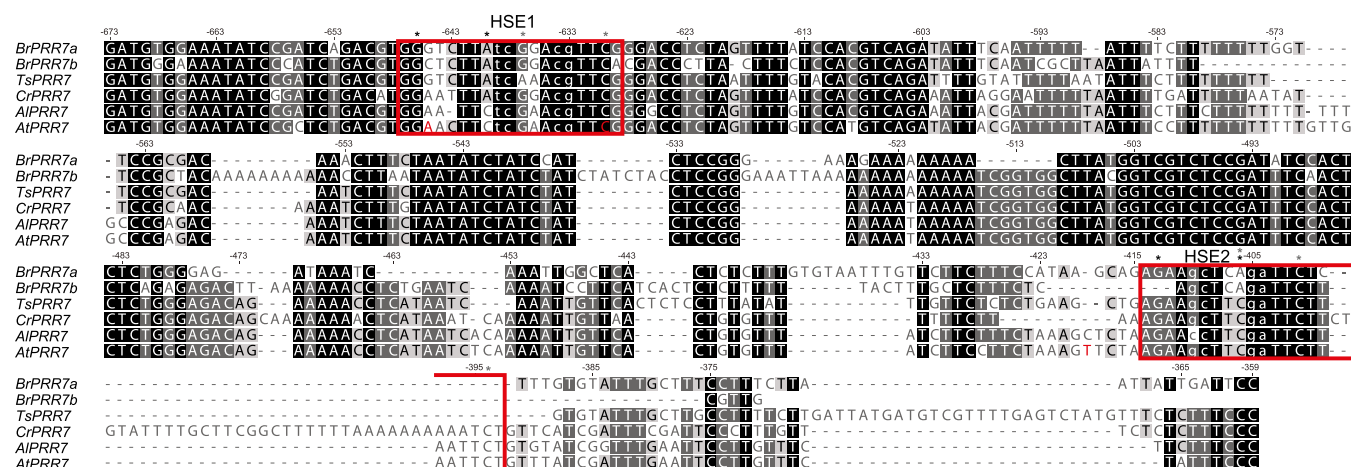

**Fig. S1.** The inverted HSE repeats in the *PRR7* promoter (HSE1 and HSE2; boxes) are conserved among relatives of *Arabidopsis*. The region shown is –673 bp to –328 bp (relative to translation ATG). Al, *Arabidopsis lyrata*; At, *A. thaliana*; Br, *Brassica rapa*; Cr, *Capsella rubella*; Ts, *Thellungiella salsuginea*. The mutation constructs (HSEmutA and HSEmutB) were mutated as indicated (\*; black symbols for mutA, gray for mutB), with G or C replaced with T. The SNPs at positions –645, –630, and –420 bp (C to G, A to T/G, and T to C, respectively) are marked in red. Shading represents degree of similarity ( $\geq 70\%$ ).

△Col-0 *PRR7:LUC*    ●T2-23    \*T2-26

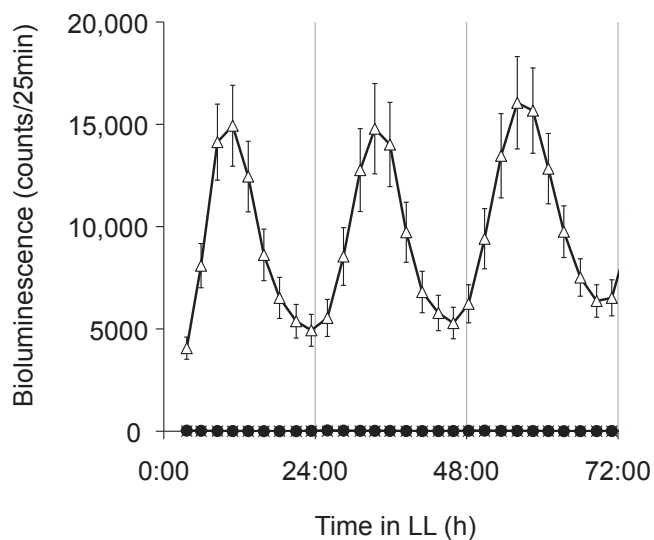

**Fig. S2.** Bioluminescence of WT *PRR7::LUC* compared with late-flowering *HsfB2b-ox* lines. Seedlings were entrained under a 12L:12D cycle for 1 wk before being transferred to constant light (LL). Two independent *HsfB2b-ox* T2 lines (#23 and #26) are shown. Error bars represent the SEM of technical replicates;  $n = 10-15$ .

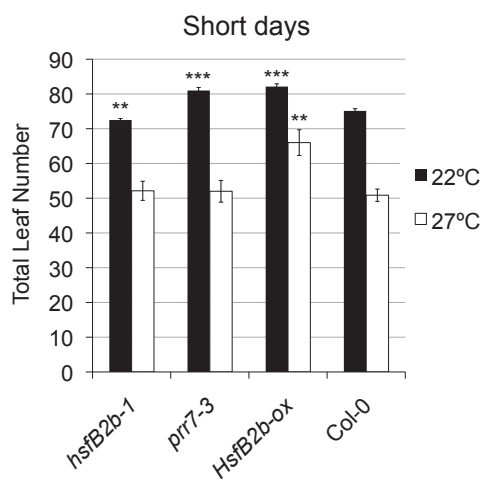

**Fig. S3.** Late flowering of *HsfB2b-ox* under short days. Plants were planted in soil and grown at 22 °C under 8L:16D short days for 2 wk before being transferred to 27 °C. The total leaf number was determined at the time of bolting. The experiment was repeated twice, yielding similar results ( $n > 8$ ). Error bars represent SEM.

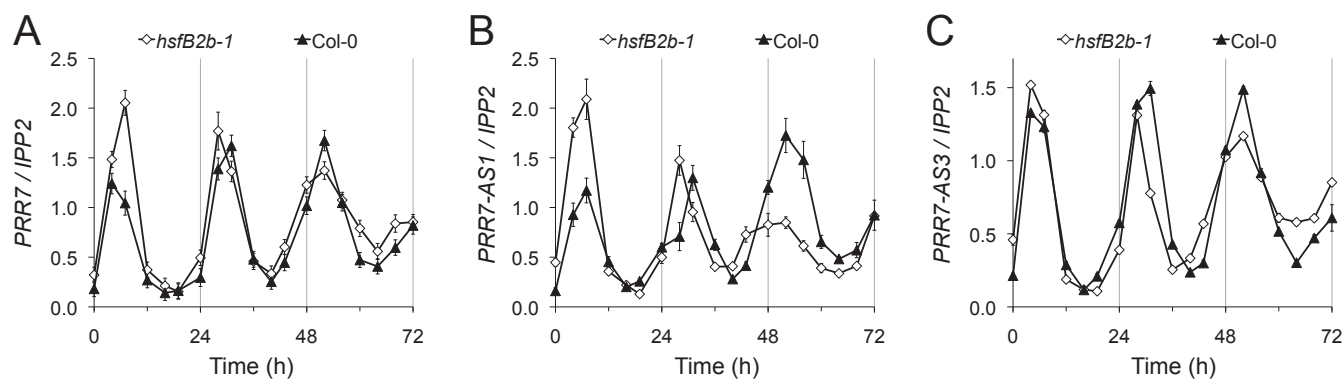

**Fig. S4.** *PRR7* transcript levels in the *hsfB2b-1* mutant background. Samples of whole seedlings were obtained under LL every 4 h after entrainment in a 12L:12D cycle for 1 wk. Three transcripts were measured: *PRR7* (A), *PRR7-AS1* (B), and *PRR7-AS3* (C). Error bars represent SEM of biological replicates.



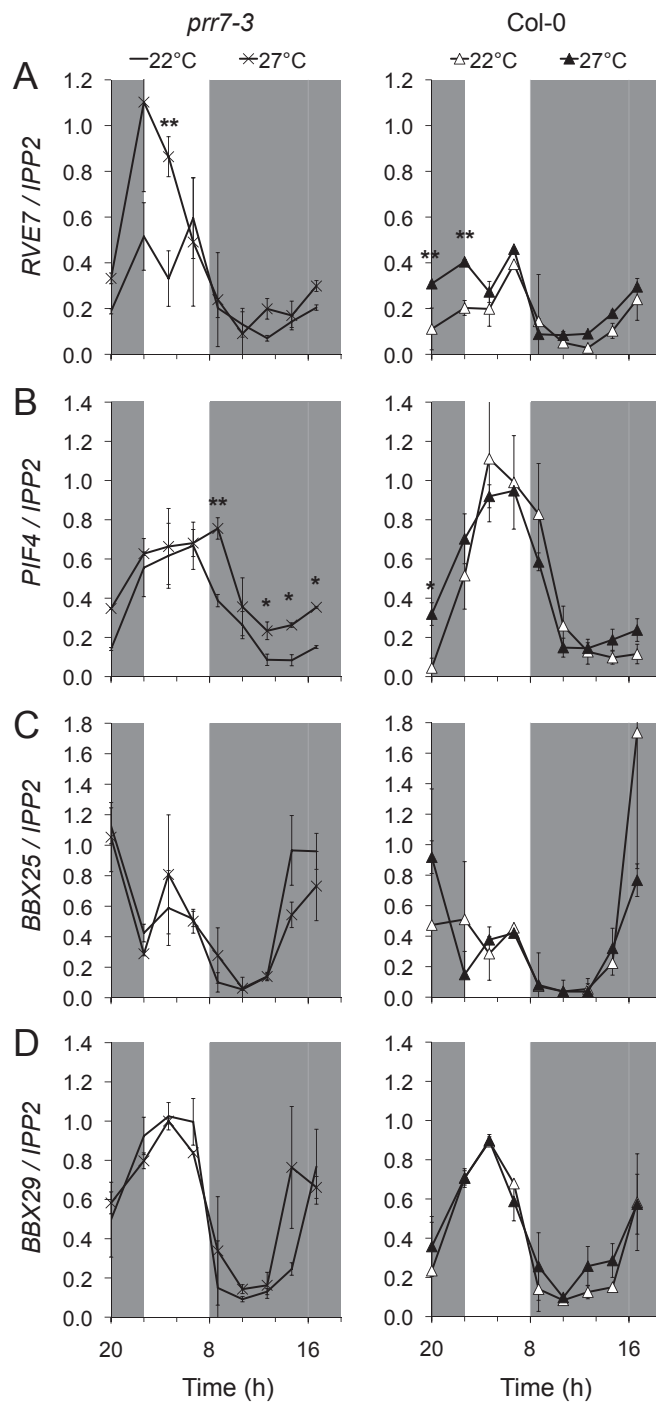

**Fig. S7.** Transcript levels, measured by qPCR, for *pr $r$ 7-3* and Col-0, under 22 °C and 27 °C short days. (A) *RVE7*. (B) *PIF4*. (C) *BBX25*. (D) *BBX29*. Samples were prepared as in Fig. 5.

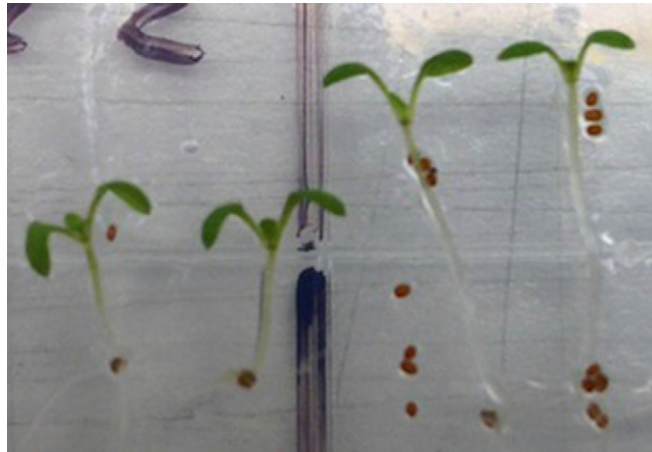

**Fig. S8.** Long hypocotyls of *35S::BBX29-ox*. The seedlings were grown under 22 °C short days for 1 wk. The control is shown on the left.

**Table S1. *PRR7* target genes that have advanced phase in short days compared with long days (DIURNAL) (1)**

| Shift, h | Gene            | AGI       |
|----------|-----------------|-----------|
| 1        | <i>AHA1</i>     | At2g18960 |
| 1        | <i>bZIP59</i>   | At2g31370 |
| 1        | <i>STH</i>      | At2g31380 |
| 1        | <i>NF-YA4</i>   | At2g34720 |
| 1        | <i>CCA1</i>     | At2g46830 |
| 1        | <i>AFP4</i>     | At3g02140 |
| 1        | <i>AtDi19-4</i> | At3g06760 |
| 1        | <i>SPD1</i>     | At3g10420 |
| 1        | <i>HYH</i>      | At3g17609 |
| 1        | <i>AtGH3.10</i> | At4g03400 |
| 1        | <i>FER1</i>     | At5g01600 |
| 1        | <i>CIPK14</i>   | At5g01820 |
| 1        | <i>PRR7</i>     | At5g02810 |
| 2        | <i>PPR-like</i> | At1g18900 |
| 2        | <i>JAZ6</i>     | At1g72450 |
| 2        | <i>MPK15</i>    | At1g73670 |
| 2        | <i>RBR1</i>     | At3g12280 |
| 2        | —               | At3g12300 |
| 2        | —               | At3g12320 |
| 2        | <i>LNK3</i>     | At3g54500 |
| 2        | <i>uORF</i>     | At5g15948 |
| 2        | <i>RVE2</i>     | At5g37260 |
| 2        | <i>LHCB3</i>    | At5g54270 |
| 2        | <i>ABA1</i>     | At5g67030 |
| 3        | <i>STO</i>      | At1g06040 |
| 3        | <i>RVE7</i>     | At1g18330 |
| 3        | <i>PIF4</i>     | At2g43010 |
| 3        | <i>PSI-P</i>    | At2g46820 |
| 3        | —               | At3g46630 |
| 3        | <i>BT2</i>      | At3g48360 |
| 3        | —               | At3g56360 |
| 3        | <i>PIF5</i>     | At3g59060 |
| 3        | <i>ATL5</i>     | At3g62690 |
| 3        | <i>LHCB5</i>    | At4g10340 |
| 3        | <i>BBX29</i>    | At5g54470 |
| 3        | <i>EXO70H7</i>  | At5g59730 |
| 4        | —               | At1g06050 |
| 4        | <i>GLX1</i>     | At1g11840 |
| 4        | —               | At3g12290 |
| 5        | <i>PIF1</i>     | At3g15840 |
| 5        | <i>LUX</i>      | At3g46640 |
| 5        | <i>FER3</i>     | At3g56090 |
| 5        | —               | At5g09620 |
| 5        | <i>OCP3</i>     | At5g11270 |
| 6        | <i>SCPL49</i>   | At3g10410 |
| 7        | <i>SIG4</i>     | At5g13730 |
| 9        | <i>HY5</i>      | At5g11260 |

1. Michael TP, et al. (2008) Network discovery pipeline elucidates conserved time-of-day-specific *cis*-regulatory modules. *PLoS Genet* 4(2):e14.

**Table S2. Primers used in this study**

| Gene, application(s)               | Forward (5'-3')                                                                                           | Reverse (5'-3')                                                                                        |
|------------------------------------|-----------------------------------------------------------------------------------------------------------|--------------------------------------------------------------------------------------------------------|
| <i>HsfA1b</i> , CDS, TOPO          | cacc ATG GAA TCG GTT CCC GAA T                                                                            | TTA TTT CCT CTG TGC TTC TGA GG                                                                         |
| <i>HsfA3</i> , CDS, TOPO           | cacc ATG AGC CCA AAA AAA GAT GC                                                                           | CTA AGG ATC ATT CAT TGG CG                                                                             |
| <i>HsfA6a</i> , CDS, TOPO          | cacc ATG GAT TAT AAC CTT CCA                                                                              | TAT AAA ATG TTC CAC TAA ATC AC                                                                         |
| <i>hsfB2b-1</i> , genotyping       | CTG AAT CGG CAA GTG TTT TTC                                                                               | AAG TAG TGG ATG TGG TGC TGG                                                                            |
| <i>HsfB2b</i> 3' UTR, qPCR         | TCC AGA TCG TTG GGA GTT TT                                                                                | GCC ATA GCA GGC TGA GAG AT                                                                             |
| <i>HsfB2b</i> , CDS, TOPO          | cacc ATG CCG GGG GAA CAA ACC                                                                              | TTT TCC GAG TTC AAG CCA CG                                                                             |
| <i>ProHsfB2b</i> , TOPO            | cacc TTT TAG AGA AAT ATA AGA TAA CCA CCA                                                                  | GAG TTA TAG ATC AAA AAT CTA AAC TTT CC                                                                 |
| <i>GFP</i> , qPCR                  | CTG CTG CCC GAC AAC CA                                                                                    | TGT GAT CGC GCT TCT CGT T                                                                              |
| <i>IPP2</i> , qPCR                 | GTA TGA GTT GCT TCT CCA GCA AAG                                                                           | GAG GAT GGC TGC AAC AAG TGT                                                                            |
| <i>HSE1A</i> , mutagenesis         | ATC CGC TCT GAC GTG TAA CTT TTC GAA CGT<br>TCG GGA C                                                      | GTC CCG AAC GTT CGA AAA GTT ACA CGT CAG AGC GGA T                                                      |
| <i>HSE1B</i> , mutagenesis         | CTG ACG TGG AAC TTC TCT AAC GTT TGG GAC<br>CTC TAG TTT TGT                                                | ACA AAA CTA GAG GTC CCA AAC GTT AGA GAA GTT CCA CGT CAG                                                |
| <i>HSE2A</i> , mutagenesis         | CTG TGT TTA TCT TCC TTC TAA AGT TCT AAT<br>AAG CTT TGA TTC TTA ATT CTG TTT ATC GAT<br>TTG AAT             | ATT CAA ATC GAT AAA CAG AAT TAA GAA TCA AAG CTT ATT AGA<br>ACT TTA GAA GGA AGA TAA ACA CAG             |
| <i>HSE2B</i> , mutagenesis         | GTG TTT ATC TTC CTT CTA AAG TTC TAA GAA GCT<br>TTG ATT TTT AAT TTT GTT TAT CGA TTT GAA<br>TTC CTT GTT TCT | AGA AAC AAG GAA TTC AAA TCG ATA AAC AAA ATT AAA AAT CAA<br>AGC TTC TTA GAA CTT TAG AAG GAA GAT AAA CAC |
| <i>HSE-SNP-645</i> , mutagenesis   | TCC GCT CTG ACG TGG TAC TTC TCG AAC GTT C                                                                 | GAA CGT TCG AGA AGT ACC ACG TCA GAG CGG A                                                              |
| <i>HSE-SNP-420</i> , mutagenesis   | CTG TGT TTA TCT TCC TTC TAA AGC TCT AAG AAG<br>CTT CGA TTC TTA AT                                         | ATT AAG AAT CGA AGC TTC TTA GAG CTT TAG AAG GAA GAT<br>AAA CAC AG                                      |
| <i>PRR7</i> , qPCR                 | TTG GAG AAG ATG CCA AAG TTC T                                                                             | GTT CCG CTC TCA CTT CCA CTA C                                                                          |
| <i>PRR7-AS1</i> , qPCR             | CGG TCT CTT GTG CAA GAT TT                                                                                | AGA TGA TGA CAG GGA TGT TCC                                                                            |
| <i>PRR7-AS3</i> , qPCR             | TCC CTG TCA TCA GTG AGT TCT T                                                                             | GCA TCT ACT TTC CAA CAT ACG C                                                                          |
| <i>proPRR7</i> , 2kb, TOPO         | cacc CTT TCT CTG CTG CAA TGA CAT TGA GAC TTG                                                              | CAC ACC AAC TCT GCT TCG CTG AAT TC                                                                     |
| <i>proPRR7</i> , -673/-328bp, TOPO | cacc GAT GTG GAA ATA TCC GCT CTG ACG TGG AAC                                                              | GAA AAA TGG ATC TAG CAC AAT CAG CTA ACG                                                                |
| <i>proUBQ10</i> , Gateway B4/B1R   | ggg gac aac ttt gta tag aaa agt tgg a AAG<br>CTT CGA CGA GTC AGT AAT AA                                   | ggg gac tgc ttt ttt gta caa act tgt ACT AGT CTG TTA ATC<br>AGA AAA ACT CAG A                           |
| <i>BBX25</i> , qPCR                | CTG CGA CAT CTG CCT TGA GAA G                                                                             | AGA GCG AGT ATT TGG CGC ATG G                                                                          |
| <i>BBX28</i> , qPCR                | CAG ATC TTC TCT GCT CCG ATG ATG                                                                           | GCG CCG TTC ATT CTG ACG ATA C                                                                          |
| <i>BBX29</i> , qPCR                | AAC CTC TCC GAT GAG GAG AAC C                                                                             | ATC TTG ACA AAC CTT CGT CTC TCG                                                                        |
| <i>HY5</i> , qPCR                  | CAC CAT GCA GGA ACA AGC GAC TAG CT                                                                        | TCA AAG GCT TGC ATC AGC ATT AG                                                                         |
| <i>HYH</i> , qPCR                  | TCA ACG GGA TAT AGT GGA AAA GA                                                                            | TGG TTG GCT TAT AAA AGA ACA CG                                                                         |
| <i>PIF4</i> , qPCR                 | TCT CCG ACC GGT TTG CTA GA                                                                                | CGC GGC CTG CAT GTG T                                                                                  |
| <i>RVE7</i> , qPCR                 | CAG AAA TCT TCG GTG GAC GGA                                                                               | TGA AAC GCT TTC TTG CTG CA                                                                             |

Overhangs for cloning are in lower-case type.
